# Supplementary material
Source: publisher figshare collection journal article supplement (https://gsajournals.figshare.com/ndownloader/files/14387615)
Supplement: Supplementary file 1 [file 14387615]

## Sheet: Table S5
Table S5. The locations and genotypes of 214 samples of SolCAP genotyping array.
IDa	Sampleb	Accessionc	Latitude	Longitude	solcap_snp_sl_10194	solcap_snp_sl_10195	solcap_snp_sl_10247	solcap_snp_sl_10552	solcap_snp_sl_10557	solcap_snp_sl_10564	solcap_snp_sl_10891	solcap_snp_sl_10893	solcap_snp_sl_10894	solcap_snp_sl_10895	solcap_snp_sl_10900	solcap_snp_sl_10901	solcap_snp_sl_10902	solcap_snp_sl_10903	solcap_snp_sl_10907	solcap_snp_sl_10909	solcap_snp_sl_10910	solcap_snp_sl_10912	solcap_snp_sl_10913	solcap_snp_sl_10917	solcap_snp_sl_10920	solcap_snp_sl_10923	solcap_snp_sl_10925	solcap_snp_sl_10927	solcap_snp_sl_10941	solcap_snp_sl_10947	solcap_snp_sl_10948	solcap_snp_sl_10949	solcap_snp_sl_10958	solcap_snp_sl_10960	solcap_snp_sl_10969	solcap_snp_sl_10971	solcap_snp_sl_11083	solcap_snp_sl_11219	solcap_snp_sl_11512	solcap_snp_sl_11520	solcap_snp_sl_11531	solcap_snp_sl_11533	solcap_snp_sl_11536	solcap_snp_sl_11540	solcap_snp_sl_11541	solcap_snp_sl_11545	solcap_snp_sl_11563	solcap_snp_sl_11564	solcap_snp_sl_11567
BGV006129_2012B	BGV006129	BGV006129	-3.9519	-79.4356	CC	TT	AA	GG	CC	CC	CC	CC	AA	AA	CC	CC	GG	GG	AA	TT	GG	TT	GG	CC	CC	CC	CC	TT	GG	CC	GG	AA	AA	AA	GG	CC	GG	AA	CC	GG	TT	TT	TT	AA	TT	AA	TT	AA	AA
BGV006129_2015B	BGV006129	BGV006129	-3.9519	-79.4356	CC	TT	AA	GG	CC	CC	CC	CC	AA	AA	CC	CC	GG	GG	AA	TT	GG	TT	GG	CC	CC	CC	CC	TT	GG	CC	GG	AA	AA	AA	GG	CC	GG	AA	CC	GG	TT	TT	TT	AA	TT	AA	TT	AA	AA
BGV006187_2012B	BGV006187	BGV006187	-3.3122	-79.6286	CC	TT	GG	TT	CC	TT	CC	CC	AA	AA	CC	CC	GG	GG	AA	TT	GG	TT	GG	CC	CC	CC	CC	TT	GG	TT	AA	AA	GG	AG	GG	CC	AA	AA	CC	CC	TT	TT	TT	GG	TT	GG	TT	AA	AA
BGV006187_2015B	BGV006187	BGV006187	-3.3122	-79.6286	CC	TT	GG	TT	CC	TT	CC	CC	AA	AA	CC	CC	GG	GG	AA	TT	GG	TT	GG	CC	CC	CC	CC	TT	GG	TT	AA	AA	GG	AG	GG	CC	AA	AA	CC	CC	TT	TT	TT	GG	TT	GG	TT	AA	AA
BGV006327_2012B	BGV006327	BGV006327	-4.8922	-80.3753	CC	TT	AA	GG	AA	TT	CC	CC	AA	AA	CC	CC	GG	GG	AA	TT	GG	TT	GG	CC	CC	CC	CC	TT	GG	CC	GG	AA	AA	AA	GG	CC	AA	AA	CC	GG	CC	CC	CC	GG	TT	GG	GG	GG	AA
BGV006327_2015B	BGV006327	BGV006327	-4.8922	-80.3753	CC	TT	AA	GG	AA	TT	CC	CC	AA	AA	CC	CC	GG	GG	AA	TT	GG	TT	GG	CC	CC	CC	CC	TT	GG	CC	GG	AA	AA	AA	GG	CC	AA	AA	CC	GG	CC	CC	CC	GG	TT	GG	GG	GG	AA
BGV006328_2012B	BGV006328	BGV006328	-4.9339	-80.5394	CT	TT	AA	GT	AC	CT	CC	CC	AA	AA	0	CT	AG	GG	AG	TT	AG	CT	CG	CT	CT	CT	CT	AT	GG	CC	GG	AA	GG	AA	GG	CC	AG	AG	CC	CC	TT	CC	CC	AA	TT	GG	TT	AA	AA
BGV006328_2015B	BGV006328	BGV006328	-4.9339	-80.5394	CT	TT	AA	GT	AC	CT	CC	CC	AA	AA	0	CT	AG	GG	AG	TT	AG	CT	CG	CT	CT	CT	CT	AT	GG	CC	GG	AA	GG	AA	GG	CC	AG	AG	CC	CC	TT	CC	CC	AA	TT	GG	TT	AA	AA
BGV006331_2012B	BGV006331	BGV006331	-4.9339	-80.5394	CC	TT	AA	GG	CC	CC	CC	CC	AA	AA	0	CC	GG	GG	AA	TT	GG	TT	GG	CC	CC	CC	CC	TT	GG	CC	GG	AA	GG	AA	GG	CC	GG	AA	CC	GG	CC	TT	TT	GG	GG	GG	GG	GG	AA
BGV006331_2015B	BGV006331	BGV006331	-5.2872	-79.9581	CC	TT	AA	GG	CC	CC	CC	CC	AA	AA	0	CC	GG	GG	AA	TT	GG	TT	GG	CC	CC	CC	CC	TT	GG	CC	GG	AA	GG	AA	GG	CC	GG	AA	CC	GG	CC	TT	TT	GG	GG	GG	GG	GG	AA
BGV006333_2012B	BGV006333	BGV006333	-4.9339	-80.5394	CC	TT	AA	GG	CC	CT	CC	CC	AA	AA	CC	CC	GG	AA	AA	CC	GG	TT	GG	CC	CC	CC	CC	TT	GG	CC	GG	AA	GG	AA	GG	CC	GG	AA	CC	CC	TT	TT	TT	GG	TT	GG	GG	AA	AA
BGV006333_2015B	BGV006333	BGV006333	-5.1869	-80.6258	CC	TT	AA	GG	CC	CT	CC	CC	AA	AA	CC	CC	GG	AA	AA	CC	GG	TT	GG	CC	CC	CC	CC	TT	GG	CC	GG	AA	GG	AA	GG	CC	GG	AA	CC	CC	TT	TT	TT	GG	TT	GG	GG	AA	AA
BGV006336_2012B	BGV006336	BGV006336	-5.3294	-79.9183	CT	TT	AA	GG	AC	TT	CC	CC	AA	AA	CC	CC	GG	GG	AA	TT	GG	TT	GG	CC	CC	CC	CC	TT	GG	CC	GG	AA	AA	AA	GG	CC	AA	AG	CC	GG	TT	TT	TT	GG	TT	GG	GG	GG	AA
BGV006336_2015B	BGV006336	BGV006336	-5.3294	-79.9183	CT	TT	AA	GG	AC	TT	CC	CC	AA	AA	CC	CC	GG	GG	AA	TT	GG	TT	GG	CC	CC	CC	CC	TT	GG	CC	GG	AA	AA	AA	GG	CC	AA	AG	CC	GG	TT	TT	TT	GG	TT	GG	GG	GG	AA
BGV006341_2012B	BGV006341	BGV006341	-5.2817	-80.6842	CC	TT	AA	GG	AA	TT	CC	TT	GG	GG	TT	TT	AA	GG	GG	TT	AA	CC	CC	TT	TT	TT	TT	AA	GG	CC	GG	AA	GG	AA	GG	CC	AA	GG	CC	CC	TT	CC	CC	GG	TT	GG	TT	AA	AA
BGV006341_2015B	BGV006341	BGV006341	-5.2817	-80.6842	CC	TT	AA	GG	AA	TT	CC	TT	GG	GG	TT	TT	AA	GG	GG	TT	AA	CC	CC	TT	TT	TT	TT	AA	GG	CC	GG	AA	GG	AA	GG	CC	AA	GG	CC	CC	TT	CC	CC	GG	TT	GG	TT	AA	AA
BGV006343_2012B	BGV006343	BGV006343	-5.3222	-80.7136	CC	GG	AA	TT	AA	TT	CC	TT	GG	GG	TT	TT	AA	GG	GG	TT	AA	CC	CC	TT	TT	TT	TT	AA	GG	CC	GG	AA	GG	AA	GG	CC	GG	AA	CC	CC	TT	TT	TT	AA	TT	GG	GG	GG	AA
BGV006343_2015B	BGV006343	BGV006343	-5.3222	-80.7136	CC	GG	AA	TT	AA	TT	CC	TT	GG	GG	TT	TT	AA	GG	GG	TT	AA	CC	CC	TT	TT	TT	TT	AA	GG	CC	GG	AA	GG	AA	GG	CC	GG	AA	CC	CC	TT	TT	TT	AA	TT	GG	GG	GG	AA
BGV006344_2012B	BGV006344	BGV006344	-5.3222	-80.7136	CC	TT	AA	GG	AA	TT	CC	TT	GG	GG	TT	TT	AA	GG	GG	TT	AA	CC	CC	TT	TT	TT	TT	AA	GG	CC	GG	AA	GG	AA	GG	CC	GG	AG	CC	GG	TT	CC	CC	0	GG	GG	GG	AA	AA
BGV006344_2015B	BGV006344	BGV006344	-5.4342	-80.7597	CC	TT	AA	GG	AA	TT	CC	TT	GG	GG	TT	TT	AA	GG	GG	TT	AA	CC	CC	TT	TT	TT	TT	AA	GG	CC	GG	AA	GG	AA	GG	CC	GG	AG	CC	GG	TT	CC	CC	0	GG	GG	GG	AA	AA
BGV006345_2012B	BGV006345	BGV006345	-5.3222	-80.7136	CC	TT	AA	GG	AA	TT	CC	CC	GG	AA	0	CC	GG	GG	AA	TT	GG	TT	GG	CC	CC	CC	CC	TT	GG	CC	GG	AA	AA	AA	GG	CC	GG	AA	CC	CC	CC	TT	TT	GG	TT	GG	GG	GG	AA
BGV006345_2015B	BGV006345	BGV006345	-5.5311	-80.8203	CC	TT	AA	GG	AA	TT	CC	CC	GG	AA	0	CC	GG	GG	AA	TT	GG	TT	GG	CC	CC	CC	CC	TT	GG	CC	GG	AA	AA	AA	GG	CC	GG	AA	CC	CC	CC	TT	TT	GG	TT	GG	GG	GG	AA
BGV006347_2012B	BGV006347	BGV006347	-5.2783	-80.1058	CC	TT	AA	GT	AC	CT	CC	CC	AA	AA	CC	CC	GG	GG	AA	TT	GG	TT	GG	CC	CC	CC	CC	TT	GG	TT	AA	GG	AA	AA	GG	CC	GG	GG	0	CC	CC	TT	TT	AA	GG	GG	GG	AA	AA
BGV006347_2015B	BGV006347	BGV006347	-5.2783	-80.1058	CC	TT	AA	GT	AC	CT	CC	CC	AA	AA	CC	CC	GG	GG	AA	TT	GG	TT	GG	CC	CC	CC	CC	TT	GG	TT	AA	GG	AA	AA	GG	CC	GG	GG	0	CC	CC	TT	TT	AA	GG	GG	GG	AA	AA
BGV006360_2012B	BGV006360	BGV006360	-5.2783	-80.1058	CC	TT	AA	GG	CC	TT	CC	CC	AA	AA	CC	CC	GG	AA	AA	CC	GG	TT	GG	CC	CC	CC	CC	TT	GG	CC	GG	AA	GG	AA	GG	CC	GG	GG	CC	CG	CT	CT	CT	AG	GG	AG	TT	AA	AA
BGV006360_2015B	BGV006360	BGV006360	-5.9244	-79.7747	CC	TT	AA	GG	CC	TT	CC	CC	AA	AA	CC	CC	GG	AA	AA	CC	GG	TT	GG	CC	CC	CC	CC	TT	GG	CC	GG	AA	GG	AA	GG	CC	GG	GG	CC	CG	CT	CT	CT	AG	GG	AG	TT	AA	AA
BGV006369_2012B	BGV006369	BGV006369	-5.2783	-80.1058	CT	TT	AA	GT	CC	TT	CC	CC	AA	AA	CT	CT	AG	GG	AG	TT	AG	CT	CG	CT	CT	CT	CT	AT	GG	TT	AA	GG	GG	AA	AG	CC	GG	GG	CC	CC	TT	TT	TT	AG	GT	GG	GT	AG	AA
BGV006369_2015B	BGV006369	BGV006369	-4.8603	-80.7853	CT	TT	AA	GT	CC	TT	CC	CC	AA	AA	CT	CT	AG	GG	AG	TT	AG	CT	CG	CT	CT	CT	CT	AT	GG	TT	AA	GG	GG	AA	AG	CC	GG	GG	CC	CC	TT	TT	TT	AG	GT	GG	GT	AG	AA
BGV006370_2012B	BGV006370	BGV006370	-5.2783	-80.1058	CC	TT	AA	GG	AA	TT	CC	CC	AA	AA	CC	CC	GG	GG	GG	TT	AA	CC	CC	TT	CC	TT	TT	AA	GG	TT	AA	AA	GG	AA	AA	CC	GG	GG	CC	CC	TT	TT	TT	GG	GG	AA	TT	AA	AA
BGV006370_2015B	BGV006370	BGV006370	-4.8503	-80.8492	CC	TT	AA	GG	AA	TT	CC	CC	AA	AA	CC	CC	GG	GG	GG	TT	AA	CC	CC	TT	CC	TT	TT	AA	GG	TT	AA	AA	GG	AA	AA	CC	GG	GG	CC	CC	TT	TT	TT	GG	GG	AA	TT	AA	AA
BGV006452_2012B	BGV006452	BGV006452	-5.1442	-80.2789	CC	TT	AA	TT	CC	TT	CC	CC	AA	AA	CC	CC	GG	AG	AA	CT	GG	TT	GG	CC	CC	CC	CC	TT	GG	0	AG	AG	AA	AA	GG	CC	GG	GG	CC	CC	CC	CC	CC	AA	GG	GG	TT	AA	AA
BGV006452_2015B	BGV006452	BGV006452	-5.1442	-80.2789	CC	TT	AA	TT	CC	TT	CC	CC	AA	AA	CC	CC	GG	AG	AA	CT	GG	TT	GG	CC	CC	CC	CC	TT	GG	0	AG	AG	AA	AA	GG	CC	GG	GG	CC	CC	CC	CC	CC	AA	GG	GG	TT	AA	AA
BGV006457_2012B	BGV006457	BGV006457	-5.1719	-80.1386	CT	GT	AA	GG	AA	CT	CC	CT	AG	AG	TT	TT	AA	GG	GG	TT	AA	CC	CC	TT	TT	TT	TT	AA	GG	CC	GG	AA	GG	AA	GG	CC	GG	AG	CC	CC	TT	CC	CC	AA	GG	AA	TT	AA	AA
BGV006457_2015B	BGV006457	BGV006457	-5.1719	-80.1386	CT	GT	AA	GG	AA	CT	CC	CT	AG	AG	TT	TT	AA	GG	GG	TT	AA	CC	CC	TT	TT	TT	TT	AA	GG	CC	GG	AA	GG	AA	GG	CC	GG	AG	CC	CC	TT	CC	CC	AA	GG	AA	TT	AA	AA
BGV006468_2012B	BGV006468	BGV006468	-5.9944	-79.705	CC	TT	AA	GT	CC	TT	CC	CC	AA	AA	CC	CC	GG	GG	AA	TT	GG	TT	GG	CC	CC	CC	CC	TT	GG	TT	AA	GG	GG	AA	GG	CC	GG	AG	CC	CC	CT	CC	CC	AG	GT	AG	GT	AG	GG
BGV006468_2015B	BGV006468	BGV006468	-5.9944	-79.705	CC	TT	AA	GT	CC	TT	CC	CC	AA	AA	CC	CC	GG	GG	AA	TT	GG	TT	GG	CC	CC	CC	CC	TT	GG	TT	AA	GG	GG	AA	GG	CC	GG	AG	CC	CC	CT	CC	CC	AG	GT	AG	GT	AG	GG
BGV006476_2012B	BGV006476	BGV006476	-6.0139	-79.6781	CC	TT	AA	GG	CC	TT	CC	CC	AA	AA	0	CC	GG	GG	AA	TT	GG	TT	GG	CC	CC	CC	CC	TT	GG	CC	GG	AA	GG	AA	GG	CC	GG	AA	CC	CC	CC	CC	CC	AG	GG	GG	GG	GG	AG
BGV006476_2015B	BGV006476	BGV006476	-6.0139	-79.6781	CC	TT	AA	GG	CC	TT	CC	CC	AA	AA	0	CC	GG	GG	AA	TT	GG	TT	GG	CC	CC	CC	CC	TT	GG	CC	GG	AA	GG	AA	GG	CC	GG	AA	CC	CC	CC	CC	CC	AG	GG	GG	GG	GG	AG
BGV006478_2012B	BGV006478	BGV006478	-6.0347	-79.6769	CC	TT	AA	GG	CC	TT	CC	CC	AA	AA	CC	CC	GG	GG	AA	TT	GG	TT	GG	CC	CC	CC	CC	TT	GG	CC	GG	AA	GG	AA	GG	CC	GG	AA	CC	CG	TT	CT	CT	0	GT	GG	GT	AG	AA
BGV006478_2015B	BGV006478	BGV006478	-6.0347	-79.6769	CC	TT	AA	GG	CC	TT	CC	CC	AA	AA	CC	CC	GG	GG	AA	TT	GG	TT	GG	CC	CC	CC	CC	TT	GG	CC	GG	AA	GG	AA	GG	CC	GG	AA	CC	CG	TT	CT	CT	0	GT	GG	GT	AG	AA
BGV006484_2012B	BGV006484	BGV006484	-6.16	-79.7006	CC	TT	AA	GG	CC	TT	CC	CC	AG	AA	CC	CC	GG	GG	AA	TT	GG	TT	GG	CC	CC	CC	CC	TT	GG	CT	AG	AG	GG	AA	GG	CC	GG	AG	CC	GG	TT	CC	CC	0	GG	GG	GG	AG	AA
BGV006484_2015B	BGV006484	BGV006484	-6.16	-79.7006	CC	TT	AA	GG	CC	TT	CC	CC	AG	AA	CC	CC	GG	GG	AA	TT	GG	TT	GG	CC	CC	CC	CC	TT	GG	CT	AG	AG	GG	AA	GG	CC	GG	AG	CC	GG	TT	CC	CC	0	GG	GG	GG	AG	AA
BGV006492_2012B	BGV006492	BGV006492	-7.1967	-79.4283	CC	TT	AA	GT	AC	TT	CC	CC	AA	AA	CC	CC	GG	GG	AA	TT	GG	TT	GG	CC	CC	CC	CC	TT	GG	CC	GG	AA	GG	AA	GG	CC	GG	AG	CC	CG	CT	CC	CC	0	GT	GG	TT	AA	AA
BGV006492_2015B	BGV006492	BGV006492	-7.1967	-79.4283	CC	TT	AA	GT	AC	TT	CC	CC	AA	AA	CC	CC	GG	GG	AA	TT	GG	TT	GG	CC	CC	CC	CC	TT	GG	CC	GG	AA	GG	AA	GG	CC	GG	AG	CC	CG	CT	CC	CC	0	GT	GG	TT	AA	AA
BGV006504_2012B	BGV006504	BGV006504	-7.3197	-79.3703	CC	TT	AA	GG	AC	TT	CC	CC	AA	AA	0	CC	GG	AG	AA	CT	GG	TT	GG	CC	CC	CC	CC	TT	GG	0	AG	AG	AG	AA	GG	CC	GG	GG	CC	CG	CC	CC	CC	AA	GT	GG	GT	AA	AA
BGV006504_2015B	BGV006504	BGV006504	-7.3197	-79.3703	CC	TT	AA	GG	AC	TT	CC	CC	AA	AA	0	CC	GG	AG	AA	CT	GG	TT	GG	CC	CC	CC	CC	TT	GG	0	AG	AG	AG	AA	GG	CC	GG	GG	CC	CG	CC	CC	CC	AA	GT	GG	GT	AA	AA
BGV006507_2012B	BGV006507	BGV006507	-7.2583	-79.2417	CC	TT	AA	GG	CC	TT	CC	CC	AA	AA	0	CC	GG	GG	AA	TT	GG	TT	GG	CC	CC	CC	CC	TT	GG	CC	GG	AA	GG	AA	GG	CC	GG	GG	CC	CC	CC	CC	CC	AA	TT	GG	TT	AA	AA
BGV006507_2015B	BGV006507	BGV006507	-7.2583	-79.2417	CC	TT	AA	GG	CC	TT	CC	CC	AA	AA	0	CC	GG	GG	AA	TT	GG	TT	GG	CC	CC	CC	CC	TT	GG	CC	GG	AA	GG	AA	GG	CC	GG	GG	CC	CC	CC	CC	CC	AA	TT	GG	TT	AA	AA
BGV006514_2012B	BGV006514	BGV006514	-7.225	-78.975	CC	TT	AA	TT	CC	TT	CC	CC	AA	AA	CC	CC	GG	AA	AA	CC	GG	TT	GG	CC	CC	CC	CC	TT	GG	TT	AA	GG	AA	AA	GG	CC	GG	GG	CC	CC	CC	CC	CC	AA	GG	GG	TT	AA	AA
BGV006514_2015B	BGV006514	BGV006514	-7.225	-78.975	CC	TT	AA	TT	CC	TT	CC	CC	AA	AA	CC	CC	GG	AA	AA	CC	GG	TT	GG	CC	CC	CC	CC	TT	GG	TT	AA	GG	AA	AA	GG	CC	GG	GG	CC	CC	CC	CC	CC	AA	GG	GG	TT	AA	AA
BGV006639_2012B	BGV006639	BGV006639	-5.1422	-80.1731	CC	TT	AA	GT	AA	CC	CC	CT	AG	AG	TT	TT	AA	GG	GG	TT	AA	CC	CC	TT	TT	TT	TT	AA	GG	CC	GG	AA	GG	AA	GG	CC	AG	GG	CC	CG	TT	CC	CC	AG	TT	GG	GT	AA	AA
BGV006639_2015B	BGV006639	BGV006639	-5.1422	-80.1731	CC	TT	AA	GT	AA	CC	CC	CT	AG	AG	TT	TT	AA	GG	GG	TT	AA	CC	CC	TT	TT	TT	TT	AA	GG	CC	GG	AA	GG	AA	GG	CC	AG	GG	CC	CG	TT	CC	CC	AG	TT	GG	GT	AA	AA
BGV006640_2012B	BGV006640	BGV006640	-5.1422	-80.1731	CC	TT	AA	TT	CC	TT	CC	CT	AG	AA	CT	CT	AG	GG	AG	TT	AG	CT	CG	CT	CC	CT	CT	AT	GG	0	AG	AA	AG	AG	AG	CC	AG	AG	0	CC	TT	CC	TT	AA	GG	GG	GG	GG	AA
BGV006640_2015B	BGV006640	BGV006640	-4.9192	-80.6353	CC	TT	AA	TT	CC	TT	CC	CT	AG	AA	CT	CT	AG	GG	AG	TT	AG	CT	CG	CT	CC	CT	CT	AT	GG	0	AG	AA	AG	AG	AG	CC	AG	AG	0	CC	TT	CC	TT	AA	GG	GG	GG	GG	AA
BGV006642_2012B	BGV006642	BGV006642	-4.8872	-80.4606	CC	TT	AA	GG	AA	CT	CC	CC	AA	AA	CC	CC	GG	GG	AA	TT	GG	TT	GG	CC	CC	CC	CC	TT	GG	CC	GG	AA	GG	AA	GG	CC	AA	AA	TT	GG	CC	TT	TT	GG	TT	GG	GG	AA	AA
BGV006642_2015B	BGV006642	BGV006642	-4.8872	-80.4606	CC	TT	AA	GG	AA	CT	CC	CC	AA	AA	CC	CC	GG	GG	AA	TT	GG	TT	GG	CC	CC	CC	CC	TT	GG	CC	GG	AA	GG	AA	GG	CC	AA	AA	TT	GG	CC	TT	TT	GG	TT	GG	GG	AA	AA
BGV006690_2012B	BGV006690	BGV006690	-4.1436	-79.8472	CC	TT	AA	TT	CC	TT	TT	TT	GG	AA	TT	TT	AA	GG	GG	TT	AA	CC	CC	TT	CC	TT	TT	AA	GG	TT	AA	AA	GG	AA	GG	CC	AG	AA	CC	CC	CC	TT	TT	0	TT	GG	GG	GG	AA
BGV006690_2015B	BGV006690	BGV006690	-4.1436	-79.8472	CC	TT	AA	TT	CC	TT	TT	TT	GG	AA	TT	TT	AA	GG	GG	TT	AA	CC	CC	TT	CC	TT	TT	AA	GG	TT	AA	AA	GG	AA	GG	CC	AG	AA	CC	CC	CC	TT	TT	0	TT	GG	GG	GG	AA
BGV006691_2012B	BGV006691	BGV006691	-4.0436	-79.6886	CC	TT	AA	TT	CC	TT	TT	TT	GG	GG	TT	TT	AA	GG	GG	TT	AA	CC	CC	TT	CC	TT	TT	AA	GG	TT	AA	AA	GG	AA	GG	CC	GG	AA	CC	GG	TT	TT	TT	GG	TT	GG	TT	AA	AA
BGV006691_2015B	BGV006691	BGV006691	-4.0436	-79.6886	CC	TT	AA	TT	CC	TT	TT	TT	GG	GG	TT	TT	AA	GG	GG	TT	AA	CC	CC	TT	CC	TT	TT	AA	GG	TT	AA	AA	GG	AA	GG	CC	GG	AA	CC	GG	TT	TT	TT	GG	TT	GG	TT	AA	AA
BGV006712_2012B	BGV006712	BGV006712	-3.3053	-79.3519	CC	TT	GG	TT	CC	TT	CC	TT	GG	AA	TT	TT	AA	GG	GG	TT	AA	CC	CC	TT	CC	TT	TT	AA	TT	CC	GG	AA	GG	AA	GG	TT	AA	AA	CC	CC	TT	TT	TT	AA	TT	AA	TT	AA	AA
BGV006712_2015B	BGV006712	BGV006712	-3.3053	-79.3519	CC	TT	GG	TT	CC	TT	CC	TT	GG	AA	TT	TT	AA	GG	GG	TT	AA	CC	CC	TT	CC	TT	TT	AA	TT	CC	GG	AA	GG	AA	GG	TT	AA	AA	CC	CC	TT	TT	TT	AA	TT	AA	TT	AA	AA
BGV006775_2015B	BGV006775	BGV006775	-1.0361	-77.6911	CC	TT	GG	TT	CC	CC	TT	CC	GG	AA	TT	TT	AA	GG	GG	TT	AA	CC	CC	TT	CC	TT	TT	AA	GT	CC	GG	AA	GG	AG	AA	TT	AA	GG	CC	GG	TT	TT	TT	GG	TT	AA	GG	GG	AA
BGV006778_2015B	BGV006778	BGV006778	-1.0467	-77.7953	CC	GG	GG	GG	CC	TT	TT	CC	GG	AA	TT	TT	AA	GG	GG	TT	AA	CC	CC	TT	CC	TT	TT	AA	GG	CC	GG	AA	GG	GG	GG	TT	AA	GG	TT	CG	0	TT	TT	AG	TT	GG	GG	GG	GG
BGV007095_2012B	BGV007095	BGV007095	0.8831	-78.5	CC	TT	AA	TT	CC	CC	TT	CC	GG	AA	TT	TT	AA	GG	GG	TT	AA	CC	CC	TT	CC	TT	TT	AA	TT	CC	GG	AA	GG	AA	AA	TT	AA	GG	CC	GG	TT	TT	TT	0	TT	GG	GG	GG	AA
BGV007095_2015B	BGV007095	BGV007095	0.8831	-78.5	CC	TT	AA	TT	CC	CC	TT	CC	GG	AA	TT	TT	AA	GG	GG	TT	AA	CC	CC	TT	CC	TT	TT	AA	TT	CC	GG	AA	GG	AA	AA	TT	AA	GG	CC	GG	TT	TT	TT	0	TT	GG	GG	GG	AA
BGV007100_2012B	BGV007100	BGV007100	1.0631	-79.2014	CC	TT	AA	TT	CC	TT	TT	CC	GG	AA	TT	TT	AA	GG	GG	TT	AA	CC	CC	TT	CC	TT	TT	AA	TT	CC	GG	AA	GG	AA	AA	TT	AA	GG	CC	GG	TT	TT	TT	AA	TT	GG	GG	GG	AA
BGV007100_2015B	BGV007100	BGV007100	1.0631	-79.2014	CC	TT	AA	TT	CC	TT	TT	CC	GG	AA	TT	TT	AA	GG	GG	TT	AA	CC	CC	TT	CC	TT	TT	AA	TT	CC	GG	AA	GG	AA	AA	TT	AA	GG	CC	GG	TT	TT	TT	AA	TT	GG	GG	GG	AA
BGV007104_2012B	BGV007104	BGV007104	0.8753	-79.7753	CC	TT	AA	TT	CC	TT	TT	CC	GG	AA	TT	TT	AA	GG	GG	TT	AA	CC	CC	TT	CC	TT	TT	AA	TT	CC	GG	AA	GG	AA	AA	TT	AA	GG	CC	GG	TT	TT	TT	AA	TT	GG	GG	GG	AA
UPV23616_2015B	UPV23616	BGV007104	0.8753	-79.7753	CC	TT	AA	TT	CC	TT	TT	CC	GG	AA	TT	TT	AA	GG	GG	TT	AA	CC	CC	TT	CC	TT	TT	AA	TT	CC	GG	AA	GG	AA	AA	TT	AA	GG	CC	GG	TT	TT	TT	AA	TT	GG	GG	GG	AA
BGV007109_2012B	BGV007109	BGV007109	0.9894	-79.5336	CC	TT	GG	TT	CC	TT	TT	CC	GG	AA	TT	TT	AA	GG	GG	TT	AA	CC	CC	TT	CC	TT	TT	AA	0	CC	GG	AA	GG	AA	AA	TT	AA	GG	CC	GG	TT	TT	TT	0	TT	GG	GG	GG	AA
BGV007109_2015B	BGV007109	BGV007109	0.9894	-79.5336	CC	TT	GG	TT	CC	TT	TT	CC	GG	AA	TT	TT	AA	GG	GG	TT	AA	CC	CC	TT	CC	TT	TT	AA	0	CC	GG	AA	GG	AA	AA	TT	AA	GG	CC	GG	TT	TT	TT	0	TT	GG	GG	GG	AA
BGV007111_2012B	BGV007111	BGV007111	0.995	-79.5611	CC	TT	AA	TT	CC	TT	TT	CC	GG	AA	TT	TT	AA	GG	GG	TT	AA	CC	CC	TT	CC	TT	TT	AA	TT	CC	GG	AA	GG	AA	AA	TT	AA	GG	CC	GG	TT	TT	TT	AA	TT	GG	GG	GG	AA
BGV007111_2015B	BGV007111	BGV007111	0.995	-79.5611	CC	TT	AA	TT	CC	TT	TT	CC	GG	AA	TT	TT	AA	GG	GG	TT	AA	CC	CC	TT	CC	TT	TT	AA	TT	CC	GG	AA	GG	AA	AA	TT	AA	GG	CC	GG	TT	TT	TT	AA	TT	GG	GG	GG	AA
BGV007137_2012B	BGV007137	BGV007137	-0.2442	-79.2778	CC	TT	AA	TT	CC	CC	TT	CC	GG	AA	TT	TT	AA	GG	GG	TT	AA	CC	CC	TT	CC	TT	TT	AA	TT	CC	GG	AA	GG	AA	AA	TT	AA	GG	CC	GG	TT	TT	TT	AA	TT	GG	GG	GG	AA
BGV007137_2015B	BGV007137	BGV007137	-0.2442	-79.2778	CC	TT	AA	TT	CC	CC	TT	CC	GG	AA	TT	TT	AA	GG	GG	TT	AA	CC	CC	TT	CC	TT	TT	AA	TT	CC	GG	AA	GG	AA	AA	TT	AA	GG	CC	GG	TT	TT	TT	AA	TT	GG	GG	GG	AA
BGV007145_2012B	BGV007145	BGV007145	-0.2219	-79.4889	CC	TT	AA	TT	CC	CC	TT	CC	GG	AA	TT	TT	AA	GG	GG	TT	AA	CC	CC	TT	CC	TT	TT	AA	TT	CC	GG	AA	GG	AA	AA	TT	AA	GG	TT	GG	TT	TT	TT	AA	TT	GG	GG	GG	AA
BGV007145_2015B	BGV007145	BGV007145	-0.2219	-79.4889	CC	TT	AA	TT	CC	CC	TT	CC	GG	AA	TT	TT	AA	GG	GG	TT	AA	CC	CC	TT	CC	TT	TT	AA	TT	CC	GG	AA	GG	AA	AA	TT	AA	GG	TT	GG	TT	TT	TT	AA	TT	GG	GG	GG	AA
BGV007151_2012B	BGV007151	BGV007151	-0.1258	-79.5853	CC	TT	AA	GG	CC	TT	TT	CC	GG	AA	TT	TT	AA	GG	GG	TT	AA	CC	CC	TT	CC	TT	TT	AA	TT	CC	GG	AA	GG	AA	AA	CC	AA	GG	TT	GG	TT	TT	TT	AA	TT	GG	GG	GG	AA
BGV007151_2015B	BGV007151	BGV007151	-0.1258	-79.5853	CC	TT	AA	GG	CC	TT	TT	CC	GG	AA	TT	TT	AA	GG	GG	TT	AA	CC	CC	TT	CC	TT	TT	AA	TT	CC	GG	AA	GG	AA	AA	CC	AA	GG	TT	GG	TT	TT	TT	AA	TT	GG	GG	GG	AA
BGV007155_2012B	BGV007155	BGV007155	-0.0911	-79.7581	CC	TT	AA	TT	CC	CC	TT	CC	GG	AA	TT	TT	AA	GG	GG	TT	AA	CC	CC	TT	CC	TT	TT	AA	TT	CC	GG	AA	GG	AA	AA	TT	AA	GG	TT	GG	TT	TT	TT	AA	TT	GG	GG	GG	AA
BGV007155_2015B	BGV007155	BGV007155	-0.0911	-79.7581	CC	TT	AA	TT	CC	CC	TT	CC	GG	AA	TT	TT	AA	GG	GG	TT	AA	CC	CC	TT	CC	TT	TT	AA	TT	CC	GG	AA	GG	AA	AA	TT	AA	GG	TT	GG	TT	TT	TT	AA	TT	GG	GG	GG	AA
BGV007161_2012B	BGV007161	BGV007161	0.0053	-79.8833	CC	TT	AA	TT	CC	CC	TT	CC	GG	AA	TT	TT	AA	GG	GG	TT	AA	CC	CC	TT	CC	TT	TT	AA	TT	CC	GG	AA	GG	AA	AA	TT	AA	GG	TT	GG	TT	TT	TT	AA	TT	GG	GG	GG	AA
BGV007161_2015B	BGV007161	BGV007161	0.0053	-79.8833	CC	TT	AA	TT	CC	CC	TT	CC	GG	AA	TT	TT	AA	GG	GG	TT	AA	CC	CC	TT	CC	TT	TT	AA	TT	CC	GG	AA	GG	AA	AA	TT	AA	GG	TT	GG	TT	TT	TT	AA	TT	GG	GG	GG	AA
BGV007168_2012B	BGV007168	BGV007168	0.0358	-79.9506	CC	GG	GG	TT	CC	CC	TT	CC	GG	AA	TT	TT	AA	GG	GG	TT	AA	CC	CC	TT	CC	TT	TT	AA	TT	CC	GG	AA	GG	AA	AA	TT	AA	GG	CC	GG	TT	TT	TT	AA	TT	GG	GG	GG	AA
BGV007168_2015B	BGV007168	BGV007168	0.0358	-79.9506	CC	GG	GG	TT	CC	CC	TT	CC	GG	AA	TT	TT	AA	GG	GG	TT	AA	CC	CC	TT	CC	TT	TT	AA	TT	CC	GG	AA	GG	AA	AA	TT	AA	GG	CC	GG	TT	TT	TT	AA	TT	GG	GG	GG	AA
BGV007208_2012B	BGV007208	BGV007208	-0.7133	-80.4167	CC	GT	AA	GT	CC	CC	TT	CC	GG	AA	TT	TT	AA	GG	GG	TT	AA	CC	CC	TT	CC	TT	TT	AA	GT	TT	AA	AA	GG	AG	GG	TT	AA	GG	CT	GG	TT	TT	TT	AA	TT	GG	GG	GG	AA
BGV007208_2015B	BGV007208	BGV007208	-0.7133	-80.4167	CC	GT	AA	GT	CC	CC	TT	CC	GG	AA	TT	TT	AA	GG	GG	TT	AA	CC	CC	TT	CC	TT	TT	AA	GT	TT	AA	AA	GG	AG	GG	TT	AA	GG	CT	GG	TT	TT	TT	AA	TT	GG	GG	GG	AA
BGV007222_2012B	BGV007222	BGV007222	-0.8289	-80.4944	CC	TT	AA	GG	CC	CC	0	CC	GG	AA	TT	TT	AA	GG	GG	TT	AA	CC	CC	TT	TT	TT	TT	AA	GG	TT	AA	AA	GG	AA	AA	CC	AA	GG	CC	GG	TT	TT	TT	AA	TT	GG	GG	GG	AA
BGV007222_2015B	BGV007222	BGV007222	-0.8289	-80.4944	CC	TT	AA	GG	CC	CC	0	CC	GG	AA	TT	TT	AA	GG	GG	TT	AA	CC	CC	TT	TT	TT	TT	AA	GG	TT	AA	AA	GG	AA	AA	CC	AA	GG	CC	GG	TT	TT	TT	AA	TT	GG	GG	GG	AA
BGV007225_2012B	BGV007225	BGV007225	-0.86	-80.4694	CC	TT	GG	GG	CC	CC	TT	CC	GG	AA	TT	TT	AA	GG	GG	TT	AA	CC	CC	TT	CC	TT	TT	AA	TT	CC	GG	AA	GG	AA	AA	CC	AA	GG	TT	GG	TT	TT	TT	AA	TT	GG	GG	GG	AA
BGV007225_2015B	BGV007225	BGV007225	-0.86	-80.4694	CC	TT	GG	GG	CC	CC	TT	CC	GG	AA	TT	TT	AA	GG	GG	TT	AA	CC	CC	TT	CC	TT	TT	AA	TT	CC	GG	AA	GG	AA	AA	CC	AA	GG	TT	GG	TT	TT	TT	AA	TT	GG	GG	GG	AA
BGV007339_2015B	BGV007339	BGV007339	-3.3228	-79.8322	CT	TT	0	0	CC	TT	0	CC	AG	AA	CC	CC	GG	GG	AA	TT	GG	TT	GG	CC	CC	CC	CC	TT	GG	TT	AA	AG	GG	0	GG	CC	AG	AG	CC	CG	TT	CT	CT	0	TT	GG	TT	AA	AA
BGV007348_2012B	BGV007348	BGV007348	-3.3214	-79.7164	TT	TT	GG	TT	CC	TT	CC	CC	AA	AA	CC	CC	GG	GG	AA	TT	GG	TT	GG	CC	CC	CC	CC	TT	GG	TT	AA	AA	GG	GG	GG	CC	AA	AA	CC	CC	TT	TT	TT	GG	TT	GG	TT	AA	AA
BGV007348_2015B	BGV007348	BGV007348	-3.3214	-79.7164	TT	TT	GG	TT	CC	TT	CC	CC	AA	AA	CC	CC	GG	GG	AA	TT	GG	TT	GG	CC	CC	CC	CC	TT	GG	TT	AA	AA	GG	GG	GG	CC	AA	AA	CC	CC	TT	TT	TT	GG	TT	GG	TT	AA	AA
BGV007355_2012B	BGV007355	BGV007355	-3.3239	-79.6711	CC	TT	AA	TT	CC	TT	CC	TT	GG	AA	CC	CC	GG	GG	GG	TT	AA	CC	CC	TT	CC	TT	TT	AA	TT	CC	GG	AA	GG	AA	GG	CC	AA	AA	CC	CC	TT	TT	TT	GG	TT	GG	TT	AA	AA
BGV007355_2015B	BGV007355	BGV007355	-3.3239	-79.6711	CC	TT	AA	TT	CC	TT	CC	TT	GG	AA	CC	CC	GG	GG	GG	TT	AA	CC	CC	TT	CC	TT	TT	AA	TT	CC	GG	AA	GG	AA	GG	CC	AA	AA	CC	CC	TT	TT	TT	GG	TT	GG	TT	AA	AA
BGV007366_2012B	BGV007366	BGV007366	-3.3283	-79.6081	TT	TT	AA	TT	CC	TT	CC	TT	GG	AA	CC	CC	GG	GG	GG	TT	AA	CC	CC	TT	CC	TT	TT	AA	TT	CC	GG	AA	GG	AA	GG	CC	AA	AA	CC	CC	TT	TT	TT	GG	TT	GG	TT	AA	AA
BGV007366_2015B	BGV007366	BGV007366	-3.3283	-79.6081	TT	TT	AA	TT	CC	TT	CC	TT	GG	AA	CC	CC	GG	GG	GG	TT	AA	CC	CC	TT	CC	TT	TT	AA	TT	CC	GG	AA	GG	AA	GG	CC	AA	AA	CC	CC	TT	TT	TT	GG	TT	GG	TT	AA	AA
BGV007946_2012B	BGV007946	BGV007946	-7.3083	-79.325	CC	TT	AA	TT	AA	TT	CC	CC	AA	AA	CC	CC	GG	GG	AA	TT	GG	TT	GG	CC	CC	CC	CC	TT	GG	CC	GG	AA	GG	AA	GG	CC	GG	GG	CC	CC	TT	CC	CC	AA	GG	GG	TT	AA	AA
PE9_2015B	PE9	BGV007946	-7.3083	-79.325	CC	TT	AA	TT	AA	TT	CC	CC	AA	AA	CC	CC	GG	GG	AA	TT	GG	TT	GG	CC	CC	CC	CC	TT	GG	CC	GG	AA	GG	AA	GG	CC	GG	GG	CC	CC	TT	CC	CC	AA	GG	GG	TT	AA	AA
BGV007947_2012B	BGV007947	BGV007947	-7.2583	-79.125	CC	TT	AA	TT	CC	TT	CC	CC	AA	AA	0	CC	GG	AA	AA	CC	GG	TT	GG	CC	CC	CC	CC	TT	GG	TT	AA	GG	AA	AA	GG	CC	AA	GG	CC	CC	CC	CC	CC	AA	GG	GG	TT	AA	AA
BGV007947_2015B	BGV007947	BGV007947	-7.2583	-79.125	CC	TT	AA	TT	CC	TT	CC	CC	AA	AA	0	CC	GG	AA	AA	CC	GG	TT	GG	CC	CC	CC	CC	TT	GG	TT	AA	GG	AA	AA	GG	CC	AA	GG	CC	CC	CC	CC	CC	AA	GG	GG	TT	AA	AA
BGV013717_2012B	BGV013717	BGV013717	-14.8256	-74.9556	CC	TT	AA	GG	CC	TT	CT	CC	GG	AA	CC	CC	GG	GG	AA	TT	GG	TT	GG	CC	CC	CC	CC	TT	GG	TT	AA	GG	GG	AA	GG	CC	AA	GG	CC	GG	0	CC	CC	AG	GG	GG	TT	AA	AA
BGV013720_2012B	BGV013720	BGV013720	-14.5803	-74.8872	CC	TT	AA	GG	CC	TT	CC	CC	GG	AA	0	CC	GG	GG	AA	TT	GG	TT	GG	CC	CC	CC	CC	TT	GG	TT	AA	GG	GG	AA	GG	CC	AA	GG	CC	GG	TT	CC	CC	AG	GG	GG	TT	AA	AA
BGV015381_2012B	BGV015381	BGV015381	-5.5156	-78.8233	CC	TT	AA	GG	CC	TT	CC	CC	AA	AA	0	CC	GG	AA	AA	CC	GG	TT	GG	CC	CC	CC	CC	TT	TT	TT	AA	GG	GG	AA	GG	CC	GG	AA	CC	GG	TT	TT	TT	0	GG	AA	GG	GG	AA
PT61_2015B	PT61	BGV015381	-5.5156	-78.8233	CC	TT	AA	GG	CC	TT	CC	CC	AA	AA	0	CC	GG	AA	AA	CC	GG	TT	GG	CC	CC	CC	CC	TT	TT	TT	AA	GG	GG	AA	GG	CC	GG	AA	CC	GG	TT	TT	TT	0	GG	AA	GG	GG	AA
BGV015382_2012B	BGV015382	BGV015382	-5.8856	-78.1761	CC	TT	AA	GG	CC	TT	CC	CC	AA	AA	0	CC	GG	GG	AA	TT	GG	TT	GG	CC	CC	CC	CC	TT	TT	TT	AA	GG	GG	AA	AA	CC	GG	GG	CC	CC	TT	TT	TT	AA	TT	GG	GG	GG	AA
PT210BIS_2015B	PT210BIS	BGV015382	-5.8856	-78.1761	CC	TT	AA	GG	CC	TT	CC	CC	AA	AA	0	CC	GG	GG	AA	TT	GG	TT	GG	CC	CC	CC	CC	TT	TT	TT	AA	GG	GG	AA	AA	CC	GG	GG	CC	CC	TT	TT	TT	AA	TT	GG	GG	GG	AA
ECU1781_2015B	ECU1781	ECU1781	-0.6417	-80.425	CC	TT	AA	GG	CC	TT	CC	CC	AA	AA	0	CC	GG	GG	AA	TT	GG	TT	GG	CC	CC	CC	CC	TT	GG	CC	GG	AA	GG	AA	GG	CC	AG	GG	CC	CC	CC	CC	CC	0	GG	GG	TT	AA	AA
CR060_2015B	CR060	LA0121	-8.1844	-78.9956	CC	TT	AA	GG	CC	TT	CC	CC	AA	AA	CT	CC	GG	GG	AA	TT	GG	TT	GG	CC	CC	CC	CC	TT	GG	CC	GG	AA	GG	AG	GG	CC	GG	GG	CC	CC	CT	CC	CC	AG	TT	GG	TT	AA	AA
LA0373_inra_2015B	LA0373_inra	LA0373	-9.94	-78.23	CC	TT	AA	GG	CC	TT	CC	CC	AA	AA	CC	CC	GG	AA	AA	CC	GG	TT	GG	CC	CC	CC	CC	TT	GG	TT	AA	GG	GG	AG	GG	CC	GG	GG	CC	CC	CC	CC	CC	AA	TT	GG	TT	AA	AA
SCT_0372_2012S	SCT_0372	LA0373	-9.94	-78.23	CC	TT	AA	GG	CC	TT	CC	CC	AA	AA	CC	CC	GG	GG	AA	TT	GG	TT	GG	CC	CC	CC	CC	TT	GG	CC	GG	AA	GG	AG	GG	CC	GG	AA	CC	CC	CC	CC	CC	AA	GG	GG	GG	AA	AA
CR163_2015B	CR163	LA0400	-5.2608	-79.9642	CC	TT	AA	GG	CC	TT	CC	CC	AA	AA	CT	CC	GG	GG	AA	TT	GG	TT	GG	CC	CC	CC	CC	TT	GG	CC	GG	AA	GG	AG	GG	CC	GG	GG	CC	CG	CC	CT	CT	0	TT	GG	GT	AA	AA
LA0400_2015B	LA0400	LA0400	-5.2608	-79.9642	CC	TT	AA	GG	CC	TT	CC	CC	AA	AA	CC	CC	GG	AG	AA	CT	GG	TT	GG	CC	CC	CC	CC	TT	GG	CT	AG	0	AG	AG	GG	CC	GG	GG	CC	CG	CC	CT	CT	AG	TT	GG	GT	AA	AA
LA0722_2015B	LA0722	LA0722	-8.1167	-79.0333	TT	TT	AA	TT	CC	TT	CC	CC	AA	AA	0	CC	GG	GG	AA	TT	GG	TT	GG	CC	CC	CC	CC	TT	GG	CC	GG	AA	GG	AG	GG	CC	GG	GG	CC	CC	CC	CC	CC	AA	TT	GG	TT	AA	AA
SCT_0378_2012S	SCT_0378	LA0722	-8.1167	-79.0333	TT	TT	AA	TT	CC	TT	CC	CC	AA	AA	0	CC	GG	GG	AA	TT	GG	TT	GG	CC	CC	CC	CC	TT	GG	CC	GG	AA	GG	AG	GG	CC	GG	GG	CC	CC	CC	CC	CC	AA	TT	GG	TT	AA	AA
LA121_1_2012B	LA121_1	LA121_1	-8.17	-79.01	CC	TT	AA	GG	CC	TT	CC	CC	AA	AA	CC	CC	GG	AA	AA	CC	GG	TT	GG	CC	CC	CC	CC	TT	GG	TT	AA	GG	AA	AA	GG	CC	AA	GG	CC	CC	TT	CC	CC	AA	TT	GG	TT	AA	AA
LA121_1_2015B	LA121_1	LA121_1	-8.17	-79.01	CC	TT	AA	GG	CC	TT	CC	CC	AA	AA	CC	CC	GG	AA	AA	CC	GG	TT	GG	CC	CC	CC	CC	TT	GG	TT	AA	GG	AA	AA	GG	CC	AA	GG	CC	CC	TT	CC	CC	AA	TT	GG	TT	AA	AA
LA1245_2015B	LA1245	LA1245	-3.4583	-79.9667	CT	TT	AA	GG	CC	TT	CC	CC	AA	AA	CC	CC	GG	GG	AA	TT	GG	TT	GG	CC	CC	CC	CC	TT	GG	TT	0	AA	GG	AG	GG	CC	AA	GG	CC	GG	TT	TT	TT	GG	TT	GG	TT	AA	AA
LA1246_2015B	LA1246	LA1246	-3.99	-79.36	CC	TT	0	GG	CC	CC	CC	CC	AA	AA	CC	CC	GG	GG	AA	TT	GG	TT	GG	CC	CC	CC	CC	TT	GG	TT	0	AA	GG	AG	GG	CC	0	AA	CC	CG	TT	TT	TT	AA	TT	AG	TT	AA	AA
LA1263_2015B	LA1263	LA1263	-2.4	-79.49	CC	GT	AA	GT	CC	TT	CT	CC	AG	AA	CC	0	0	GG	AG	TT	AG	CT	CG	0	CT	CT	0	0	GG	TT	AA	AA	GG	AG	0	0	AA	AA	CT	0	TT	CT	0	AA	0	AG	0	0	AG
CR057_2015B	CR057	LA1269	-11.475	-77.1083	TT	TT	AA	GG	CC	TT	CC	CC	AA	AA	CT	CC	GG	GG	AA	TT	GG	TT	GG	CC	CC	CC	CC	TT	GG	CC	GG	AA	GG	AG	GG	CC	GG	GG	CC	CC	CC	CC	CC	AG	TT	GG	TT	AA	AA
LA1269_2015B	LA1269	LA1269	-11.475	-77.1083	TT	TT	AA	GG	CC	TT	CC	CC	AA	AA	CC	CC	GG	GG	AA	TT	GG	TT	GG	CC	CC	CC	CC	TT	GG	CC	GG	AA	GG	AG	GG	CC	GG	GG	CC	CC	CC	CC	CC	AA	TT	GG	TT	AA	AA
SCT_0383_2012S	SCT_0383	LA1269	-11.475	-77.1083	TT	TT	AA	GG	CC	TT	CC	CC	AA	AA	CC	CC	GG	GG	AA	TT	GG	TT	GG	CC	CC	CC	CC	TT	GG	CC	GG	AA	GG	AG	GG	CC	GG	GG	CC	CC	CC	CC	CC	AA	TT	GG	TT	AA	AA
LA1301_2015B	LA1301	LA1301	-13.7333	-75.9167	CC	TT	AA	GG	CC	TT	CC	CC	GG	AA	0	CC	GG	GG	AA	TT	GG	TT	GG	CC	CC	CC	CC	TT	GG	TT	AA	GG	GG	AG	GG	CC	AA	GG	CC	CC	TT	CC	CC	AA	GG	GG	TT	AA	AA
LA1301_inra_2015B	LA1301_inra	LA1301	-13.7333	-75.9167	CC	TT	AA	GG	CC	TT	CC	CC	GG	AA	CC	CC	GG	GG	AA	TT	GG	TT	GG	CC	CC	CC	CC	TT	GG	TT	AA	GG	GG	AG	GG	CC	AA	GG	CC	CC	TT	CC	CC	AA	GG	GG	TT	AA	AA
SCT_0388_2012S	SCT_0388	LA1301	-13.7333	-75.9167	CC	TT	AA	GG	CC	TT	CC	CC	GG	AA	0	CC	GG	GG	AA	TT	GG	TT	GG	CC	CC	CC	CC	TT	GG	TT	AA	GG	GG	AG	GG	CC	AA	GG	CC	CC	TT	CC	CC	AA	GG	GG	TT	AA	AA
CR169_2015B	CR169	LA1371	-11.8894	-76.6539	CC	TT	AA	GG	CC	TT	CC	CC	AA	AA	CT	CC	GG	GG	AA	TT	GG	TT	GG	CC	CC	CC	CC	TT	GG	CC	GG	AA	GG	AG	GG	CC	GG	GG	CC	CC	TT	CC	CC	AG	GG	GG	TT	AA	AA
LA1371_2015B	LA1371	LA1371	-11.9008	-76.6633	CC	TT	AA	GG	CC	TT	CC	CC	AA	AA	CC	CC	GG	GG	AA	TT	GG	TT	GG	CC	CC	CC	CC	TT	GG	CC	GG	AA	GG	AG	GG	CC	GG	GG	CC	CC	TT	CC	CC	AA	GG	GG	TT	AA	AA
CR120_2015B	CR120	LA1429	-0.8167	-80.2333	CC	0	AG	TT	CC	TT	TT	CC	GG	AA	TT	0	AA	GG	GG	TT	0	CC	CC	TT	CC	0	TT	0	GG	CT	AG	AA	GG	AG	AA	CC	AA	GG	TT	GG	TT	TT	TT	AG	TT	GG	GG	GG	0
LA-1429_2012B	LA-1429	LA1429	-0.8083	-80.2417	CC	TT	AA	TT	CC	TT	TT	CC	GG	AA	TT	TT	AA	GG	GG	TT	AA	CC	CC	TT	CC	TT	TT	AA	0	CC	GG	AA	GG	AA	AA	CC	AA	GG	TT	GG	TT	TT	TT	AA	TT	GG	GG	GG	AA
LA1429_2015B	LA1429	LA1429	-0.8083	-80.2417	CC	TT	AA	TT	CC	TT	TT	CC	GG	AA	TT	TT	AA	GG	GG	TT	AA	CC	CC	TT	CC	TT	TT	AA	0	CC	GG	AA	GG	AA	AA	CC	AA	GG	TT	GG	TT	TT	TT	AA	TT	GG	GG	GG	AA
CR062_2015B	CR062	LA1478	-5.2167	-80.0833	CC	TT	AA	GG	CC	CC	CC	CC	AA	AA	CT	CC	0	GG	AA	TT	0	TT	GG	CC	0	0	CC	AT	GG	CT	0	0	GG	AG	GG	CC	GG	AA	CC	CC	TT	TT	TT	AG	GG	AA	GG	GG	AA
SCT_0397_2012S	SCT_0397	LA1478	-5.2167	-80.0833	CC	TT	AA	GG	CC	TT	CC	CC	AA	AA	CC	CC	GG	GG	AA	TT	GG	TT	GG	CC	CC	CC	CC	TT	GG	CC	GG	AA	GG	AG	GG	CC	AA	AA	CC	CC	TT	CC	CC	AA	GG	GG	TT	AA	AA
LA1521_2015B	LA1521	LA1521	-12.7647	-76.5053	CC	TT	AA	GG	CC	TT	CC	CC	GG	AA	CC	CC	GG	GG	AA	TT	GG	TT	GG	CC	CC	CC	CC	TT	GG	TT	AA	GG	GG	AG	GG	CC	GG	AA	CC	CC	TT	CC	CC	AA	GG	GG	TT	AA	AA
CR173_2015B	CR173	LA1547	0.5833	-77.9333	CC	TT	AA	0	CC	TT	CT	CC	AG	AA	0	0	0	AG	AG	CT	AG	CT	CG	CT	CC	CT	CT	0	GG	CC	GG	AA	GG	0	GG	CT	AA	GG	CC	CC	CC	CC	CC	AG	GG	GG	TT	AA	GG
LA1547_2015B	LA1547	LA1547	0.5833	-77.9333	CC	TT	AA	TG	CC	TT	CC	CC	AA	AA	0	CC	GG	AA	AA	CC	GG	TT	GG	CC	CC	CC	CC	TT	GG	CC	GG	AA	GG	AG	GG	CC	GG	GG	CC	GG	TT	TT	TT	AA	TT	GG	TG	AG	GG
LA1547_inra_2015B	LA1547_inra	LA1547	0.5833	-77.9333	CC	TT	AA	0	CC	TT	CC	CC	AA	AA	CC	CC	GG	AA	AA	CC	GG	TT	GG	CC	CC	CC	CC	TT	GG	CC	GG	AA	GG	AG	GG	CC	0	GG	CC	CG	CT	0	CT	AA	GT	GG	TT	AA	GG
SCT_0401_2012S	SCT_0401	LA1547	0.5833	-77.9333	CC	TT	AA	TG	CC	TT	CC	CC	AA	AA	0	CC	GG	AA	AA	CC	GG	TT	GG	CC	CC	CC	CC	TT	GG	CC	GG	AA	GG	AG	GG	CC	GG	GG	CC	GG	TT	TT	TT	AA	TT	GG	TG	AG	GG
LA1576_2015B	LA1576	LA1576	-12.1667	-76.8667	TT	TT	AA	GG	CC	TT	CC	CC	AA	AA	CC	CC	GG	GG	AA	TT	GG	TT	GG	CC	CC	CC	CC	TT	GG	CC	GG	AA	GG	AG	GG	CC	GG	GG	0	CC	CC	CC	CC	AA	GG	GG	TT	AA	AA
LA1578_2015B	LA1578	LA1578	-7.3333	-79.5833	CC	0	0	TG	CC	TT	CC	CC	AA	AA	CC	CC	GG	GG	AA	TT	GG	TT	GG	CC	CC	CC	CC	TT	GG	0	GG	AA	GG	AG	GG	CC	AG	GG	TC	GC	TT	TC	TC	AA	TG	GG	TG	AG	AG
SCT_0404_2012S	SCT_0404	LA1578	-7.3333	-79.5833	CC	0	0	TG	CC	TT	CC	CC	AA	AA	CC	CC	GG	GG	AA	TT	GG	TT	GG	CC	CC	CC	CC	TT	GG	0	GG	AA	GG	AG	GG	CC	AG	GG	TC	GC	TT	TC	TC	AA	TG	GG	TG	AG	AG
LA1582_2015B	LA1582	LA1582	-6.15	-79.7333	CC	TT	AA	GG	CC	TT	CC	CC	AA	AA	CC	CC	GG	0	AA	0	GG	TT	GG	CC	CC	CC	CC	TT	GG	CC	GG	AA	GG	AG	GG	CC	GG	AA	CC	GG	CC	CC	CC	AA	GG	GG	GG	AA	AA
LA1582_inra_2015B	LA1582_inra	LA1582	-6.15	-79.7333	CC	TT	AA	0	CC	TT	CC	CC	AA	AA	CC	CC	GG	AA	AA	CC	GG	TT	GG	CC	CC	CC	CC	TT	GG	CC	GG	AA	GG	AG	GG	CC	GG	AG	CC	0	CC	CC	CC	AA	GG	GG	GT	AA	AA
SCT_0405_2012S	SCT_0405	LA1582	-6.15	-79.7333	CC	TT	AA	GG	CC	TT	CC	CC	AA	AA	CC	CC	GG	0	AA	0	GG	TT	GG	CC	CC	CC	CC	TT	GG	CC	GG	AA	GG	AG	GG	CC	GG	AA	CC	GG	CC	CC	CC	AA	GG	GG	GG	AA	AA
LA1584_2015B	LA1584	LA1584	-6.37	-79.79	CC	TT	AA	GG	AC	TT	CC	CC	AG	AA	CC	CC	GG	AG	AA	CT	GG	TT	GG	CC	CC	CC	CC	TT	GG	CT	AG	AG	GG	AG	GG	CC	GG	0	CC	0	CC	CC	CC	AA	GG	GG	TT	AA	AA
LA1586_2015B	LA1586	LA1586	-8.36	-78.73	CC	TT	AA	GG	AC	CT	CC	CC	AA	AA	CC	CC	GG	GG	AA	TT	GG	TT	GG	CC	CC	CC	CC	TT	GG	CC	GG	AA	GG	AG	GG	CC	GG	AA	CC	CC	0	CC	CC	AA	GG	GG	GT	AA	AA
LA1588_2015B	LA1588	LA1588	-8.1083	-79	CC	TT	AA	TT	CC	TT	CC	CC	AA	AA	CC	CC	GG	0	AA	0	GG	TT	GG	CC	CC	CC	CC	TT	GG	TT	0	AG	AA	AG	GG	CC	AG	AG	CC	GG	TT	CC	CC	AA	GG	GG	GG	AA	AA
LA1589_2015B	LA1589	LA1589	-8.39	-78.74	CC	TT	AA	GG	CC	TT	CC	CC	AA	AA	CC	CC	GG	AA	AA	CC	GG	TT	GG	CC	CC	CC	CC	TT	GG	TT	AA	GG	AA	AG	GG	CC	GG	GG	CC	CC	TT	CC	CC	AA	TT	GG	TT	AA	GG
LA1589_koenig_2015B	LA1589_koenig	LA1589	-8.39	-78.74	CC	0	AA	0	0	0	0	0	AA	0	0	0	0	0	AA	CC	GG	TT	0	CC	0	CC	CC	0	GG	TT	AA	GG	AA	0	GG	0	0	0	0	0	0	0	0	0	0	0	0	0	AG
SCT_0406_2012S	SCT_0406	LA1589	-8.39	-78.74	CC	TT	AA	GG	CC	TT	CC	CC	AA	AA	CC	CC	GG	AA	AA	CC	GG	TT	GG	CC	CC	CC	CC	TT	GG	TT	AA	GG	AA	AG	GG	CC	GG	GG	CC	CC	TT	CC	CC	AA	TT	GG	TT	AA	GG
LA1590_2015B	LA1590	LA1590	-8.37	-78.73	CC	TT	AA	GT	CC	TT	CC	CC	AA	AA	CC	CC	GG	AA	AA	CC	GG	TT	GG	CC	CC	CC	CC	TT	GG	TT	AA	GG	GG	AG	GG	CC	GG	AA	CC	CC	CC	CC	CC	AA	TT	GG	TT	AA	AG
LA1593_2015B	LA1593	LA1593	-8.54	-78.67	CC	TT	AA	GG	CC	TT	CC	CC	GG	AA	CC	CC	0	GG	AA	TT	GG	TT	GG	CC	CC	CC	CC	TT	GG	TT	AA	GG	GG	AG	GG	CC	GG	AA	CC	CC	CC	CC	CC	AA	GG	GG	TT	AA	AA
LA1595_2015B	LA1595	LA1595	-9.27	-78.47	CC	TT	AA	GG	CC	TT	CC	CC	AG	AA	CC	CC	GG	AG	AA	CT	GG	TT	GG	CC	CC	CC	CC	TT	GG	0	AG	AG	AA	AG	GG	CC	GG	0	CC	CG	0	CC	CC	AA	GT	GG	TT	AA	AA
LA1599_2015B	LA1599	LA1599	-10.0583	-78.1833	CC	TT	AA	GG	CC	TT	CC	CC	AA	AA	CC	CC	GG	AA	AA	CC	GG	TT	GG	CC	CC	CC	CC	TT	GG	TT	AA	GG	0	AG	GG	CC	GG	GG	CC	CC	TT	CC	CC	AA	0	GG	TT	AA	GG
CR181_2015B	CR181	LA1602	-11.7833	-76.9833	TT	TT	AA	GG	CC	TT	CC	CC	AA	AA	CT	CC	GG	GG	AA	TT	GG	TT	GG	CC	CC	CC	CC	TT	GG	CC	GG	AA	GG	AG	GG	CC	GG	GG	CC	CC	CC	CC	CC	AG	GG	GG	TT	AA	AA
LA1606_2015B	LA1606	LA1606	-13.4667	-76.2	TT	TT	AA	GG	CC	TT	CC	CC	GG	AA	CC	CC	GG	GG	AA	TT	GG	TT	GG	CC	CC	CC	CC	TT	GG	CC	GG	AA	GG	AG	GG	CC	AA	AG	CC	CC	TT	CC	CC	AA	GG	GG	TT	AA	GG
LA1617_2015B	LA1617	LA1617	-3.5667	-80.4667	TT	TT	0	TT	CC	TT	TC	TC	GG	AA	0	TC	0	GG	AG	TT	0	0	CG	0	CC	0	0	AT	GG	TT	AA	AA	GG	AG	AA	CC	GG	AA	CC	CC	CC	CC	CC	GG	TT	GG	GG	GG	AA
SCT_0407_2012S	SCT_0407	LA1617	-3.5667	-80.4667	TT	TT	0	TT	CC	TT	TC	TC	GG	AA	0	TC	0	GG	AG	TT	0	0	CG	0	CC	0	0	AT	GG	TT	AA	AA	GG	AG	AA	CC	GG	AA	CC	CC	CC	CC	CC	GG	TT	GG	GG	GG	AA
LA1659_2015B	LA1659	LA1659	-9.55	-77.85	CC	TT	AA	GG	CC	TT	CC	CC	AA	AA	CC	CC	GG	GG	AA	TT	GG	TT	GG	CC	CC	CC	CC	AA	GG	TT	AA	GG	GG	AG	GG	CC	GG	GG	CC	CC	0	CC	CC	AA	GG	GG	TT	AA	GG
LA1682_2015B	LA1682	LA1682	-13.0833	-76.4	CC	TT	AA	GG	CC	TT	CC	CC	AA	AA	CC	CC	GG	GG	AA	TT	GG	TT	GG	CC	CC	CC	CC	TT	GG	CC	GG	AA	GG	AG	GG	CC	GG	GG	CC	CC	TT	CC	CC	AA	GG	GG	TT	AA	AA
LA1683_2015B	LA1683	LA1683	-4.87	-81.11	CC	TT	AA	GG	CC	CC	CC	CC	AA	AA	TT	TT	AA	GG	GG	TT	AA	CC	CC	TT	CT	TT	TT	AA	GG	CT	AG	AA	GG	AG	GG	CC	AG	AG	CC	CC	TT	CC	CC	AA	GG	GG	GG	GG	AG
LA1684_2015B	LA1684	LA1684	-5.1	-80.15	CC	TT	AA	GG	CC	0	CC	CC	AA	AA	TT	TT	AA	GG	GG	TT	AA	CC	CC	TT	CT	TT	TT	AA	GG	CC	GG	AA	AG	AG	AG	CC	GG	AA	CC	CG	TT	CT	0	AA	GG	GG	GG	GG	AA
CR186_2015B	CR186	LA1689	-5.1764	-80.6175	CC	TT	AG	GG	AC	TT	CC	CC	AG	AA	CT	0	AG	0	0	0	AG	0	0	0	CT	CT	0	0	GG	0	AG	AG	0	AG	GG	CC	0	AA	CC	CC	CT	TT	TT	AG	TT	GG	GG	AG	AA
LA-1689_2012B	LA-1689	LA1689	-5.3683	-81.0472	CC	TT	AA	GG	CC	TT	CC	CC	AA	AA	CT	CT	0	AG	AG	CT	AG	CT	CG	CT	CT	CT	CT	AT	GG	CT	AG	AG	GG	AA	GG	CC	GG	AA	CC	CC	CT	TT	TT	AG	TT	GG	GG	AG	AA
LA1689_2015B	LA1689	LA1689	-5.3683	-81.0472	CC	TT	AA	GG	CC	TT	CC	CC	AA	AA	CT	CT	0	AG	AG	CT	AG	CT	CG	CT	CT	CT	CT	AT	GG	CT	AG	AG	GG	AA	GG	CC	GG	AA	CC	CC	CT	TT	TT	AG	TT	GG	GG	AG	AA
LA-1923_2012B	LA-1923	LA1923	-14.675	-75.2917	CC	TT	AA	GG	CC	TT	CC	CC	GG	AA	CC	CC	GG	GG	AA	TT	GG	TT	GG	CC	CC	CC	CC	TT	GG	TT	AA	GG	GG	AA	GG	CC	GG	GG	CC	GG	TT	CC	CC	AA	GG	GG	TT	AA	AA
LA1923_2015B	LA1923	LA1923	-14.675	-75.2917	CC	TT	AA	GG	CC	TT	CC	CC	GG	AA	CC	CC	GG	GG	AA	TT	GG	TT	GG	CC	CC	CC	CC	TT	GG	TT	AA	GG	GG	AA	GG	CC	GG	GG	CC	GG	TT	CC	CC	AA	GG	GG	TT	AA	AA
LA1933_inra_2015B	LA1933_inra	LA1933	-15.4564	-74.4458	TT	TT	AA	GG	CC	TT	TT	CC	GG	AA	CC	CC	GG	GG	AA	TT	GG	TT	GG	CC	CC	CC	CC	TT	GG	TT	AA	GG	GG	AG	GG	CC	GG	GG	CC	GG	0	CC	CC	AA	TT	GG	TT	AA	AA
LA-1936_2012B	LA-1936	LA1936	-15.8267	-74.0208	TT	TT	AA	GG	CC	TT	TT	CC	GG	AA	0	CC	GG	GG	AA	TT	GG	TT	GG	CC	CC	CC	CC	TT	GG	TT	AA	GG	GG	AA	GG	CC	GG	GG	CC	CC	TT	CC	CC	AA	GG	GG	TT	AA	AA
LA1936_2015B	LA1936	LA1936	-15.8267	-74.0208	TT	TT	AA	GG	CC	TT	TT	CC	GG	AA	0	CC	GG	GG	AA	TT	GG	TT	GG	CC	CC	CC	CC	TT	GG	TT	AA	GG	GG	AA	GG	CC	GG	GG	CC	CC	TT	CC	CC	AA	GG	GG	TT	AA	AA
LA1950_2015B	LA1950	LA1950	-16.3886	-73.2581	TT	TT	AA	GG	CC	TT	TT	CC	GG	AA	CC	CC	GG	GG	AA	TT	GG	TT	GG	CC	CC	CC	CC	TT	GG	TT	AA	GG	GG	AG	GG	CC	AA	GG	CC	GG	TT	CC	CC	AA	GG	GG	TT	AA	AA
LA2093_2015B	LA2093	LA2093	-3.6281	-79.8881	CC	TT	AA	TT	CC	TT	CC	CC	AA	AA	CC	CC	GG	GG	AA	TT	GG	TT	GG	CC	CC	CC	CC	TT	GG	TT	AA	AA	GG	AG	GG	CC	AA	AA	CC	CC	TT	TT	TT	GG	TT	GG	TT	AA	AA
SCT_0430_2012S	SCT_0430	LA2093	-3.6281	-79.8881	CC	TT	AA	TT	CC	TT	CC	CC	AA	AA	CC	CC	GG	GG	AA	TT	GG	TT	GG	CC	CC	CC	CC	TT	GG	TT	AA	AA	GG	AG	GG	CC	AA	AA	CC	CC	TT	TT	TT	GG	TT	GG	TT	AA	AA
LA2173_2015B	LA2173	LA2173	-5.2833	-78.8083	CC	TT	AA	TT	CC	TT	CC	CC	AG	AA	CC	CC	GG	GG	AA	TT	GG	TT	GG	CC	CC	CC	CC	TT	GG	TT	AA	GG	GG	AG	GG	CC	GG	GG	CC	CC	TT	CC	CC	AA	GG	GG	TT	AA	AA
LA2180_2015B	LA2180	LA2180	-5.43	-78.87	CT	TT	AA	GG	CC	TT	CC	CC	AA	AA	CC	CC	GG	AG	AA	CT	GG	TT	GG	CC	CC	CC	CC	TT	GG	TT	AA	AG	AG	AG	GG	CC	AG	AA	CT	CG	CT	CT	0	0	GT	AG	0	0	AA
LA2181_2015B	LA2181	LA2181	-5.7758	-78.7831	CC	TT	AA	GG	AC	TT	CC	CC	GG	AA	CC	CC	GG	GG	AA	TT	GG	TT	GG	CC	CC	CC	CC	TT	GG	TT	AA	GG	GG	AG	GG	CC	GG	AA	CC	CC	TT	CC	CC	AA	GG	GG	TT	AA	AA
LA2181_inra_2015B	LA2181_inra	LA2181	-5.7758	-78.7831	CC	TT	AA	0	0	TT	CT	CT	AG	AG	CT	CT	AG	AG	AG	CT	AG	CT	CG	0	CC	CT	CT	0	0	TT	AA	AG	GG	AG	GG	CC	GG	AA	CC	CG	TT	CT	CT	AA	GG	AG	GT	AG	AA
SCT_0437_2012S	SCT_0437	LA2181	-5.7758	-78.7831	CC	TT	AA	GG	AC	TT	CC	CC	GG	AA	CC	CC	GG	GG	AA	TT	GG	TT	GG	CC	CC	CC	CC	TT	GG	TT	AA	GG	GG	AG	GG	CC	GG	AA	CC	CC	TT	CC	CC	AA	GG	GG	TT	AA	AA
LA2182_2015B	LA2182	LA2182	-5.925	-78.6583	CC	TT	AA	GT	CC	TT	CC	CC	AA	AA	CC	CC	GG	AA	AA	CC	GG	TT	GG	CC	CC	CC	CC	TT	GT	TT	AA	GG	GG	AA	GG	CC	GG	AA	CC	CG	CT	CT	CT	0	GG	AG	GG	AG	AA
LA2183_2015B	LA2183	LA2183	-5.74	-78.67	CT	TT	0	GG	CC	TT	CC	CC	AA	AA	CC	CC	GG	GG	AA	TT	GG	TT	GG	CC	CC	CC	CC	TT	GG	TT	AA	AA	GG	AG	AA	CC	GG	GG	CC	CG	TT	TT	TT	AA	GT	AA	GG	GG	AA
LA2184_2015B	LA2184	LA2184	-5.5875	-78.5506	TT	TT	AA	GG	CC	TT	CC	CC	AA	AA	CC	CC	GG	GG	AA	TT	GG	TT	GG	CC	CC	CC	CC	TT	TG	TT	AA	AG	GG	AG	AG	CC	GG	GG	TT	CC	CC	TT	TT	GG	TT	GG	GG	GG	AA
SCT_0438_2012S	SCT_0438	LA2184	-5.5875	-78.5506	TT	TT	AA	GG	CC	TT	CC	CC	AA	AA	CC	CC	GG	GG	AA	TT	GG	TT	GG	CC	CC	CC	CC	TT	TG	TT	AA	AG	GG	AG	AG	CC	GG	GG	TT	CC	CC	TT	TT	GG	TT	GG	GG	GG	AA
LA-2188_2012B	LA-2188	LA2188	-5.9917	-78.1917	TT	TT	AA	TT	CC	TT	TT	TT	GG	GG	TT	TT	AA	GG	GG	TT	AA	CC	CC	TT	CC	TT	TT	AA	GG	TT	AA	AA	GG	AA	GG	CC	AG	GG	CC	CG	TT	TT	TT	GG	TT	GG	TT	AA	AA
LA2188_2015B	LA2188	LA2188	-5.9917	-78.1917	TT	TT	AA	TT	CC	TT	TT	TT	GG	GG	TT	TT	AA	GG	GG	TT	AA	CC	CC	TT	CC	TT	TT	AA	GG	TT	AA	AA	GG	AA	GG	CC	AG	GG	CC	CG	TT	TT	TT	GG	TT	GG	TT	AA	AA
LA2401_2015B	LA2401	LA2401	-9.5167	-78.2333	CC	TT	AA	GG	CC	TT	CC	CC	AA	AA	CC	CC	GG	GG	AA	TT	GG	TT	GG	CC	CC	CC	CC	TT	GG	CT	AG	0	AA	AG	GG	CC	GG	GG	CC	GG	CC	CC	CC	AA	TT	GG	TT	AA	AA
LA2533_2015B	LA2533	LA2533	-11.3	-77.36	TT	TT	AA	GG	CC	TT	CC	CC	AA	AA	CC	CC	GG	GG	AA	TT	GG	TT	GG	CC	CC	CC	CC	TT	GG	CC	GG	AA	GG	AG	GG	CC	GG	GG	CC	CC	CC	CC	CC	AA	GG	GG	TT	AA	AA
LA2533_A_2015B	LA2533_A	LA2533	-11.3	-77.36	TT	TT	AA	GG	CC	TT	CC	CC	AA	AA	CC	CC	GG	GG	AA	TT	GG	TT	GG	CC	CC	CC	CC	TT	GG	CC	GG	AA	GG	AG	GG	CC	GG	GG	CC	CC	CC	CC	CC	AA	GG	GG	TT	AA	AA
LA2533_Pool_2015B	LA2533_Pool	LA2533	-11.3	-77.36	TT	TT	AA	GG	CC	TT	CC	CC	AA	AA	CC	CC	GG	GG	AA	TT	GG	TT	GG	CC	CC	CC	CC	TT	GG	CC	GG	AA	GG	AG	GG	CC	GG	GG	CC	CC	CC	CC	CC	AA	GG	GG	TT	AA	AA
LA2660_2015B	LA2660	LA2660	-14.9967	-65.6401	CC	TT	AA	TT	CC	TT	TC	TC	AG	AA	0	0	AG	GG	AG	TT	AG	0	CG	0	CC	0	0	AT	GG	0	0	AA	AG	AG	AG	CC	AG	AA	CC	CC	0	TC	TC	0	0	GG	GG	GG	AA
LA-2725_2012B	LA-2725	LA2725	-13.725	-75.875	CC	TT	AA	GG	CC	TT	CC	CC	GG	AA	0	CC	GG	GG	AA	TT	GG	TT	GG	CC	CC	CC	CC	TT	GG	TT	AA	GG	GG	AA	GG	CC	GG	GG	CC	CC	TT	CC	CC	0	GG	GG	TT	AA	AA
LA2725_2015B	LA2725	LA2725	-13.725	-75.875	CC	TT	AA	GG	CC	TT	CC	CC	GG	AA	0	CC	GG	GG	AA	TT	GG	TT	GG	CC	CC	CC	CC	TT	GG	TT	AA	GG	GG	AA	GG	CC	GG	GG	CC	CC	TT	CC	CC	0	GG	GG	TT	AA	AA
LA2836_2015B	LA2836	LA2836	-14.7833	-74.85	CC	TT	AA	GG	CC	TT	CC	CC	GG	AA	CC	CC	GG	GG	AA	TT	GG	TT	GG	CC	CC	CC	CC	TT	GG	TT	AA	GG	GG	AG	GG	CC	AA	GG	CC	GG	0	CC	CC	AA	GG	GG	TT	AA	AA
LA2852_2015B	LA2852	LA2852	-0.8333	-80.4833	CC	TT	0	GG	CC	TT	TT	CC	GG	AA	TT	TT	AA	GG	GG	TT	AA	CC	CC	TT	CC	TT	TT	AA	GT	CC	GG	AA	GG	AG	AA	CC	AG	0	TT	GG	TT	TT	TT	AA	TT	GG	GG	GG	GG
LA-2854_2012B	LA-2854	LA2854	-1.3417	-80.5917	CC	GG	GG	GG	CC	CC	TT	CC	GG	AA	TT	TT	AA	GG	GG	TT	AA	CC	CC	TT	CC	TT	TT	AA	GG	TT	AA	AA	GG	AA	AA	CC	AA	GG	CC	GG	TT	TT	TT	0	TT	GG	GG	GG	AA
LA2854_2015B	LA2854	LA2854	-1.3417	-80.5917	CC	GG	GG	GG	CC	CC	TT	CC	GG	AA	TT	TT	AA	GG	GG	TT	AA	CC	CC	TT	CC	TT	TT	AA	GG	TT	AA	AA	GG	AA	AA	CC	AA	GG	CC	GG	TT	TT	TT	0	TT	GG	GG	GG	AA
LA2915_2015B	LA2915	LA2915	-5.9847	-79.7453	CT	TT	AA	GG	CC	TT	CC	CC	0	AA	CC	CC	GG	AA	AA	CC	GG	TT	GG	CC	CC	CC	CC	TT	GG	CT	AG	AG	GG	AG	GG	CC	GG	AG	CC	CC	CT	CT	CT	AG	GG	GG	TT	AA	AA
LA2974_2015B	LA2974	LA2974	-8.14	-79.01	CC	TT	AA	GG	CC	TT	CC	CC	AA	AA	CC	CC	GG	AA	AA	CC	GG	TT	GG	CC	CC	CC	CC	TT	GG	TT	AA	GG	AA	AG	GG	CC	GG	AA	CC	CC	CC	CC	CC	AA	TT	GG	TT	AA	AA
LA2983_2015B	LA2983	LA2983	-12.53	-76.73	0	TT	AA	GG	CC	TT	CC	CC	GG	AA	CC	CC	GG	GG	AA	TT	GG	TT	GG	CC	CC	CC	CC	TT	GG	CC	GG	AA	GG	AG	GG	CC	GG	AA	CC	CC	TT	CC	CC	AA	GG	GG	TT	AA	AA
LA373_2015B	LA373	LA373	-9.94	-78.23	CC	TT	AA	GG	CC	TT	CC	CC	AA	AA	CC	CC	GG	GG	AA	TT	GG	TT	GG	CC	CC	CC	CC	TT	GG	CC	GG	AA	GG	AG	GG	CC	GG	AA	CC	CC	CC	CC	CC	AA	GG	GG	GG	AA	AA
PT53_2015B	PT53	PAS014528	-5.6933	-78.8017	CC	TT	AA	GG	CC	TT	CC	CC	AA	AA	CC	CC	GG	AA	AA	CC	GG	TT	GG	CC	CC	CC	CC	TT	TT	TT	AA	GG	GG	AA	GG	CC	GG	AA	CC	GG	TT	TT	TT	AA	GG	GG	GG	GG	AA
PI_128216_2015B	PI_128216	PI 128216	-16.4	-67.6767	CC	TT	AA	GG	CC	TT	CC	CC	AA	AA	CC	CC	GG	GG	AA	TT	GG	TT	GG	CC	CC	CC	CC	TT	GG	CC	GG	AA	GG	AG	GG	CC	GG	GG	CC	CC	TT	CC	CC	AA	GG	GG	TT	AA	AA
SCT_0472_2012S	SCT_0472	PI 128216	-16.4	-67.6767	CC	TT	AA	GG	CC	TT	CC	CC	AA	AA	CC	CC	GG	GG	AA	TT	GG	TT	GG	CC	CC	CC	CC	TT	GG	CC	GG	AA	GG	AG	GG	CC	GG	GG	CC	CC	TT	CC	CC	AA	GG	GG	TT	AA	AA
PI_365914_2015B	PI_365914	PI 365914	-1.5536	-79.47	CC	GG	GG	TT	CC	TT	TT	CC	GG	AA	TT	TT	AA	GG	GG	TT	AA	CC	CC	TT	TT	TT	TT	AA	TG	TT	AA	AA	GG	AG	AA	TT	AA	GG	TT	GG	0	TT	TT	AA	TT	GG	GG	GG	GG
SCT_0474_2012S	SCT_0474	PI 365914	-1.5536	-79.47	CC	GG	GG	TT	CC	TT	TT	CC	GG	AA	TT	TT	AA	GG	GG	TT	AA	CC	CC	TT	TT	TT	TT	AA	TG	TT	AA	AA	GG	AG	AA	TT	AA	GG	TT	GG	0	TT	TT	AA	TT	GG	GG	GG	GG
SCT_0494_2012S	SCT_0494	PSPL153	NA	NA	CC	GG	AA	GG	CC	CC	TT	TT	GG	GG	TT	TT	AA	GG	GG	TT	AA	CC	CC	TT	TT	TT	TT	AA	TG	CC	GG	AA	GG	GG	AA	TT	GG	GG	TT	GG	TT	TT	TT	GG	TT	AA	GG	GG	GG
PT-053_2012B	PT-053	PT-053	-5.6933	-78.8012	CC	TT	AA	GG	CC	TT	CC	CC	AA	AA	CC	CC	GG	AA	AA	CC	GG	TT	GG	CC	CC	CC	CC	TT	TT	TT	AA	GG	GG	AA	GG	CC	GG	AA	CC	GG	TT	TT	TT	AA	GG	GG	GG	GG	AA
BGV013717_2015B	BGV013717	T006	-14.8256	-74.9556	CC	TT	AA	GG	CC	TT	CT	CC	GG	AA	CC	CC	GG	GG	AA	TT	GG	TT	GG	CC	CC	CC	CC	TT	GG	TT	AA	GG	GG	AA	GG	CC	AA	GG	CC	GG	0	CC	CC	AG	GG	GG	TT	AA	AA
BGV013720_2015B	BGV013720	T011	-14.5803	-74.8872	CC	TT	AA	GG	CC	TT	CC	CC	GG	AA	0	CC	GG	GG	AA	TT	GG	TT	GG	CC	CC	CC	CC	TT	GG	TT	AA	GG	GG	AA	GG	CC	AA	GG	CC	GG	TT	CC	CC	AG	GG	GG	TT	AA	AA
CR068_2015B	CR068	VIR108	NA	NA	CC	TT	AA	GG	CC	TT	CC	CC	AA	AA	CT	CC	GG	GG	AA	TT	GG	TT	GG	CC	CC	CC	CC	TT	GG	CC	GG	AA	GG	AG	GG	CC	GG	GG	CC	CC	TT	CC	CC	AG	GG	GG	TT	AA	AA
CR069_2015B	CR069	VIR2863	NA	NA	CC	TT	AA	GG	CC	TT	CC	CC	AA	AA	CT	CC	GG	GG	AA	TT	GG	TT	GG	CC	CC	CC	CC	TT	GG	CC	GG	AA	GG	AG	GG	CC	GG	GG	CC	CC	TT	CC	CC	AG	TT	GG	TT	AA	AA
CR071_2015B	CR071	VIR2920	NA	NA	CC	TT	AA	GG	CC	TT	CC	CC	AA	AA	CT	CC	GG	GG	AA	TT	GG	TT	GG	CC	CC	CC	CC	TT	GG	CC	GG	AA	GG	AG	GG	CC	GG	GG	CC	CC	TT	CC	CC	AG	GG	GG	TT	AA	AA
CR072_2015B	CR072	VIR2921	NA	NA	CC	TT	AA	GG	CC	TT	CC	CC	AA	AA	CT	CC	GG	GG	AA	TT	GG	TT	GG	CC	CC	CC	CC	TT	GG	CC	GG	AA	GG	AG	GG	CC	GG	GG	CC	CC	TT	CC	CC	AG	GG	GG	TT	AA	AA
a: ID indicates the index, its original sample ID plus its original study, in this SolCAP meta-analysis
b: Sample indicates the original sample ID in the original study
c: Accession indicates the accession of each sample
[truncated: 2,262 more columns]
